# Supplementary material for: Yellow emitting carbon dots with superior colloidal, thermal, and photochemical stabilities
Source: Royal Society of Chemistry journal article supplement (doi:10.1039/c6tc03452g), 2016-01-01
Supplement: c6tc03452g1.pdf [file c6tc03452g1.pdf]

**Electronic Supplementary Information (ESI)**

**for**

**Yellow emitting carbon dots with superior colloidal, thermal, and  
photochemical stability**

Kasibhatta Kumara Ramanatha Datta,<sup>†, #, ‡</sup> Gengeng Qi,<sup>‡, #</sup> Radek Zboril<sup>†, \*</sup> and Emmanuel P.  
Giannelis<sup>‡, \*</sup>

<sup>†</sup> *Regional Centre of Advanced Technologies and Materials, Department of Physical Chemistry,  
Faculty of Science, Palacky University in Olomouc, Slechtitelu 27, 78371, Olomouc, Czech  
Republic.*

<sup>‡</sup> *Department of Materials Science and Engineering, Cornell University, Ithaca, New York 14853,  
United States.*

<sup>#</sup> These authors contributed equally.

<sup>‡</sup> Present address: Research Institute and Chemistry Department, SRM University,  
Chennai, Tamil Nadu, 603203, India.

\* Corresponding authors: Email: radek.zboril@upol.cz (R. Z.) and epg2@cornell.edu (E. P. G.).

Number of figures: 7

Number of tables: 1

Number of pages: 5

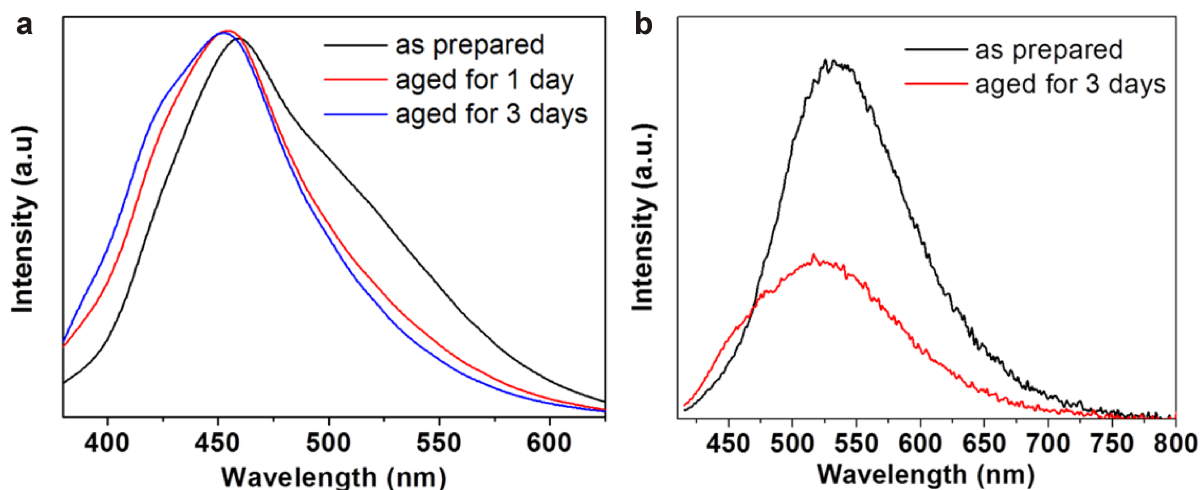

**Figure S1.** (a) PL spectra of CD-cy obtained from citric acid and cyanamide dispersed in distilled water and heated at 100 °C for 3 days. The excitation wavelength is 410 nm. (b) PL spectra of CD-cu obtained from citric acid and urea dispersed in distilled water and heated at 100 °C for 3 days. The excitation wavelength is 410 nm.

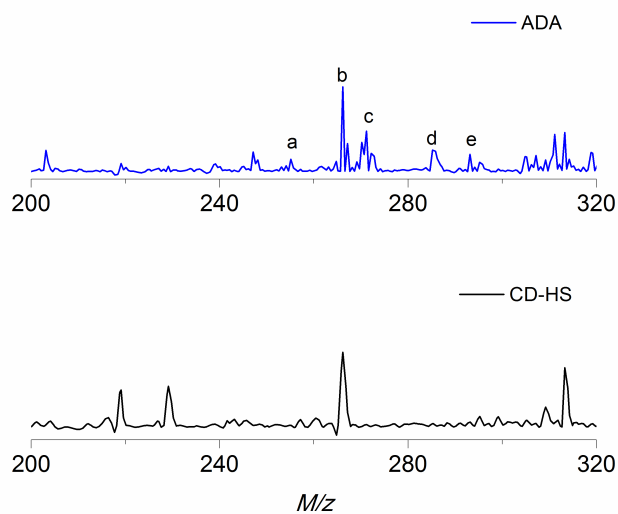

**Figure S2.** Mass spectra comparison of ADA and CD-HS.

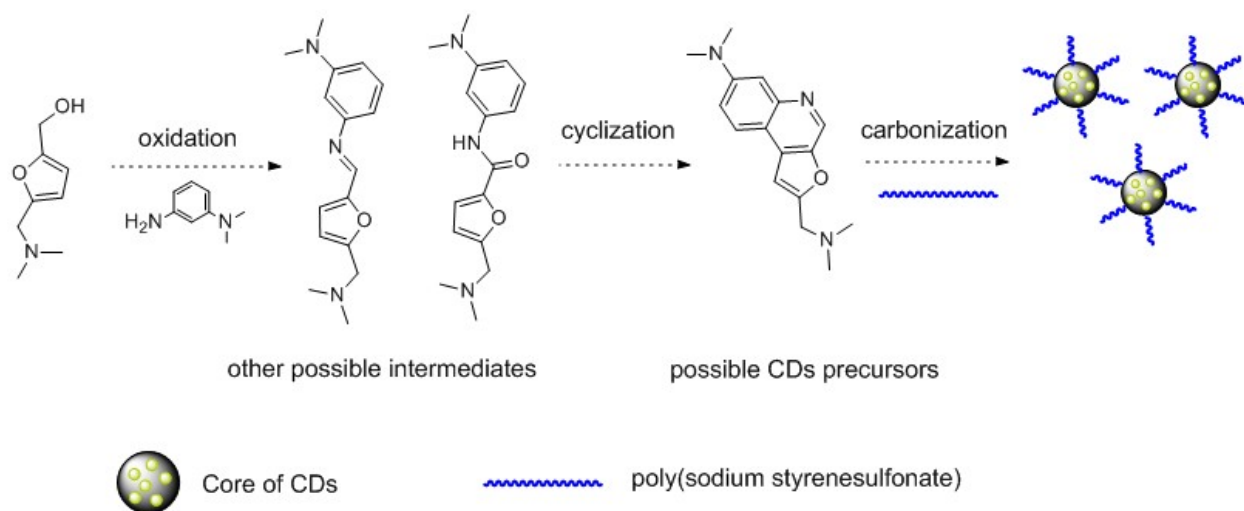

**Figure S3.** Possible reaction mechanism of yellow emitting CDs.

**Table S1.** Assignment of mass spectra peaks in Figure S2.

| Mass spectrum peaks | <i>M/z</i> | Possible species |
|---------------------|------------|------------------|
| a                   | 255        |                  |
| b                   | 266        |                  |
| c                   | 271        |                  |
| d                   | 285        |                  |
| e                   | 293        |                  |

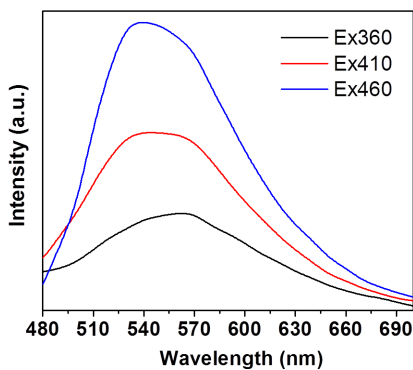

**Figure S4.** PL spectra of CD-HS excited at 360, 410 and 460 nm wavelengths, respectively.

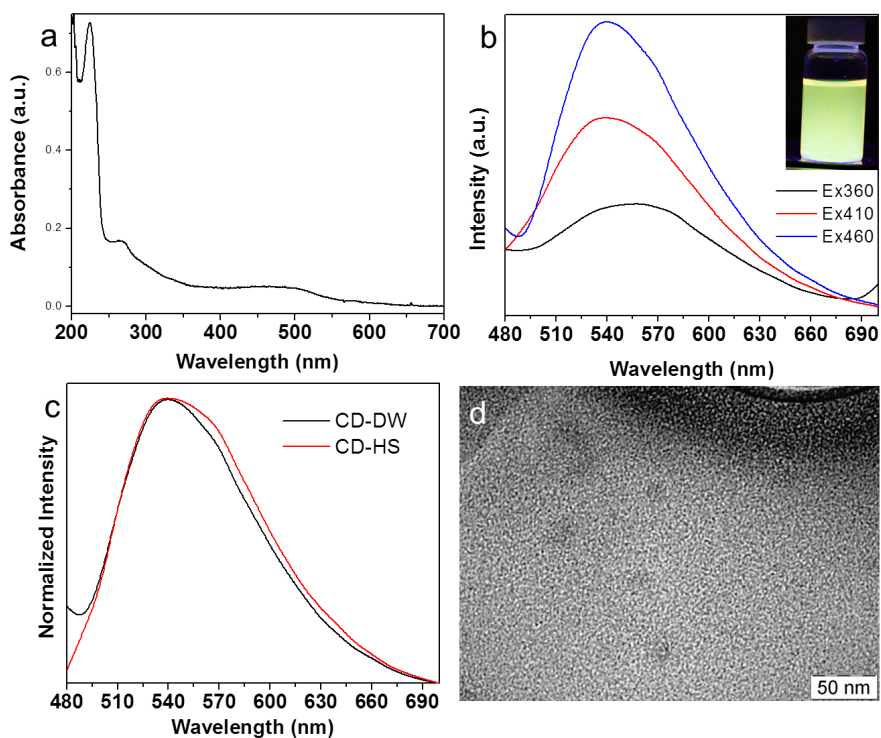

**Figure S5.** (a) UV-Vis absorption and (b) PL spectra of CD-DW excited at 360, 410 and 460 nm wavelengths respectively, inset showing photograph of aqueous dispersion of CDs taken under UV light (excited at 365 nm) showing yellow-green emission. (c) PL spectra showing the comparison between CD-HS and CD-DW excited at 460 nm. (d) TEM image of CD-DW.

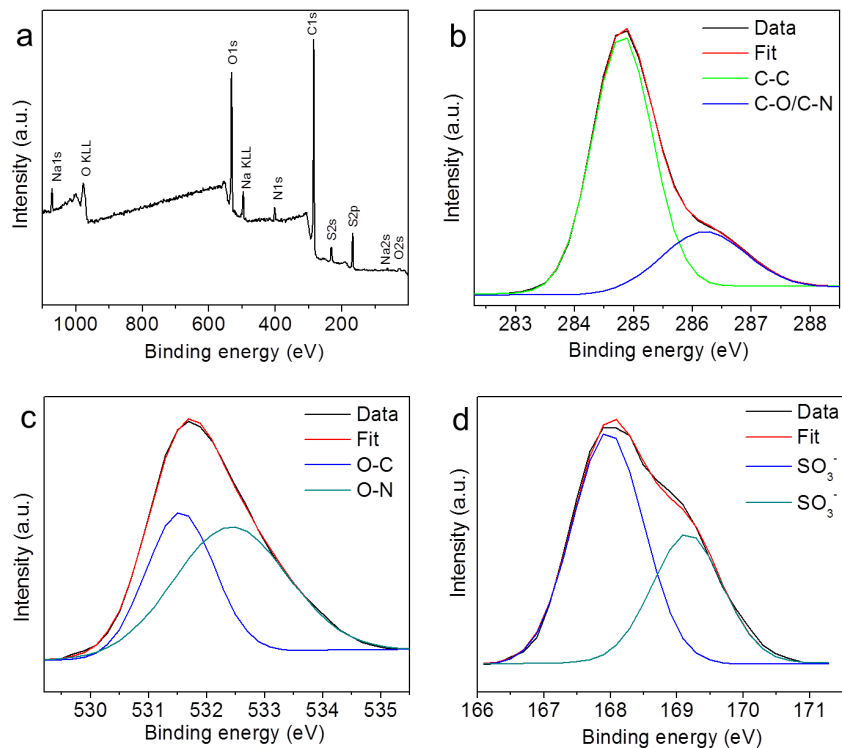

**Figure S6.** XPS spectra of CD-DW. (a) Full survey scan and the high resolution scans of (b) C1s, (c) O1s, and (d) S2p, respectively. The survey XPS spectrum indicates the existence of elements C, O, S, and N respectively for CD-DW with atomic percentages of 69, 21, 4, and 3.5 respectively.

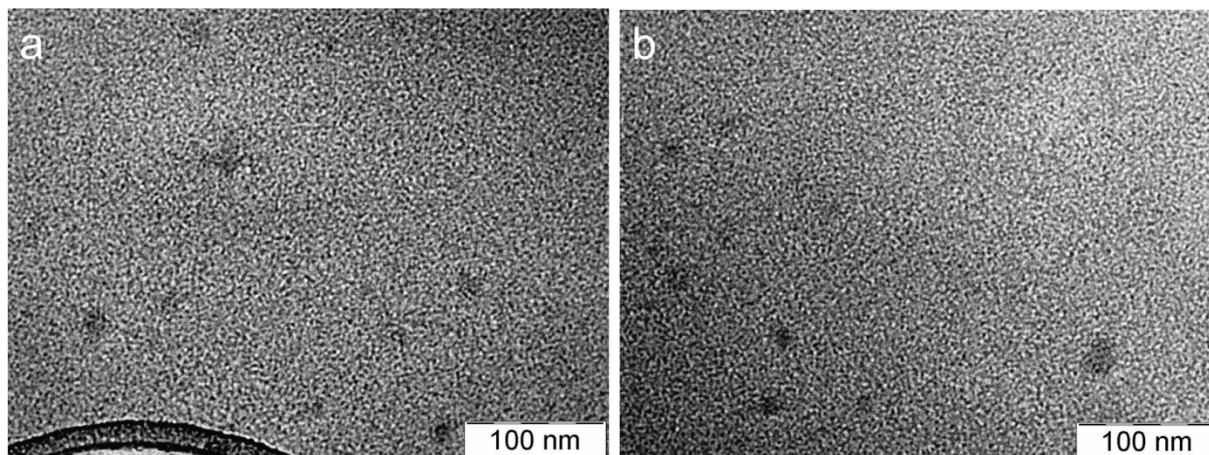

**Figure S7.** TEM of the CD-HS stored in distilled water and heated at 100 °C for (a) 3 and (b) 6 days, respectively.
